# Supplementary material for: Understanding nanoparticle flow with a new in vitro experimental and computational approach using hydrogel channels
Source: publisher site journal article supplement (doi:10.3762/bjnano.11.22), 2020-02-06
Supplement: Additional file 1 [file 2190-4286-11-22-S1.pdf]

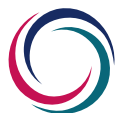

## Supporting Information

for

### **Understanding nanoparticle flow with a new in vitro experimental and computational approach using hydrogel channels**

Armel Boutchuen, Dell Zimmerman, Abdollah Arabshahi, John Melnyczuk and Soubantika Palchoudhury

*Beilstein J. Nanotechnol.* **2020**, *11*, 296–309. [doi:10.3762/bjnano.11.22](https://doi.org/10.3762/bjnano.11.22)

### **Additional experimental and computational data**

Figures S1–S3 show the swelling studies of poly(hydroxyethyl)methacrylate (pHEMA) hydrogels synthesized with different quantities of DI water. The error bars represent deviations based on 95% confidence intervals.

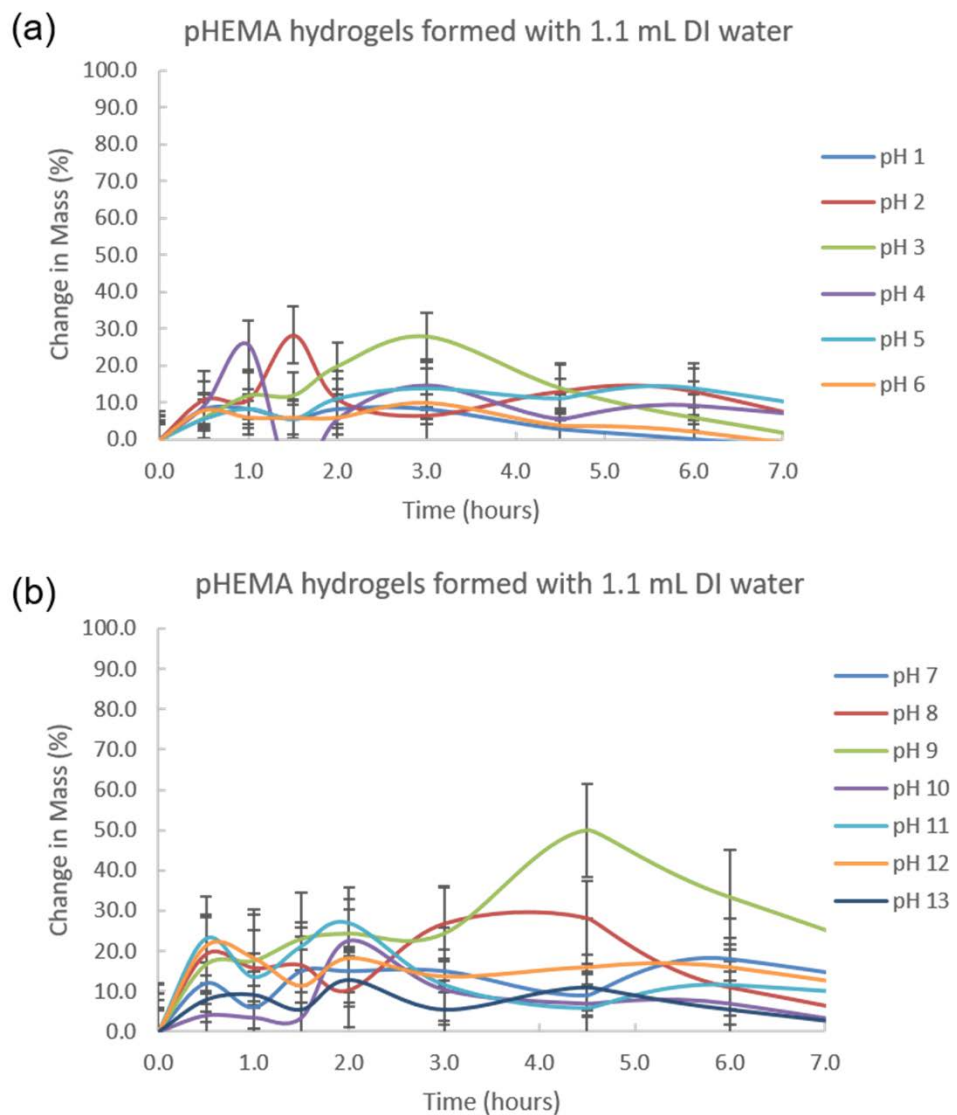

**Figure S1:** pH-Dependent swelling studies of pHEMA hydrogels synthesized with 1.1 mL DI water.

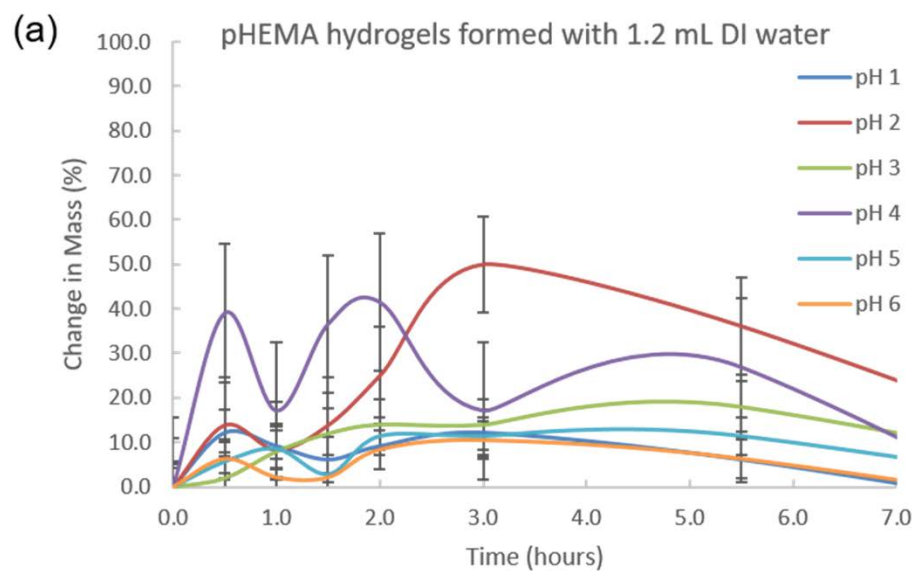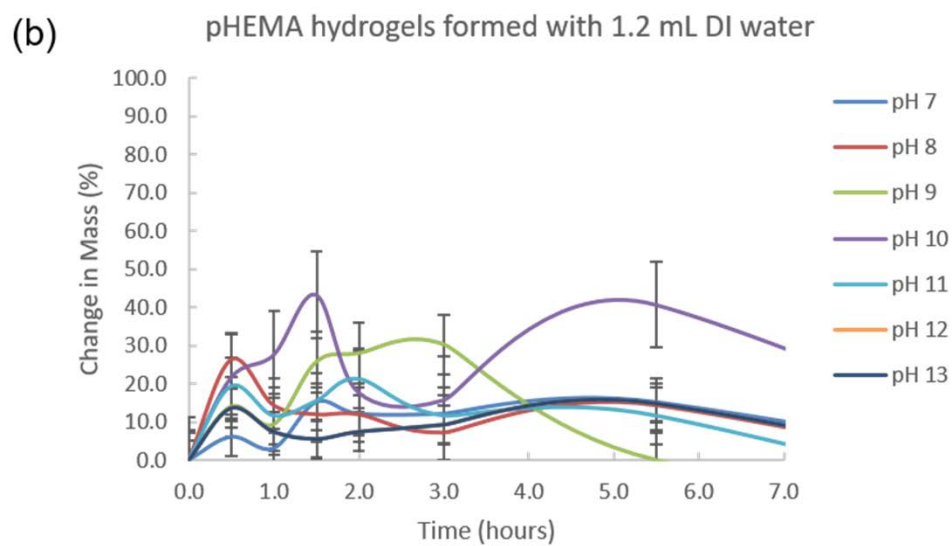

**Figure S2:** pH-Dependent swelling studies of pHEMA hydrogels synthesized with 1.2 mL DI water.

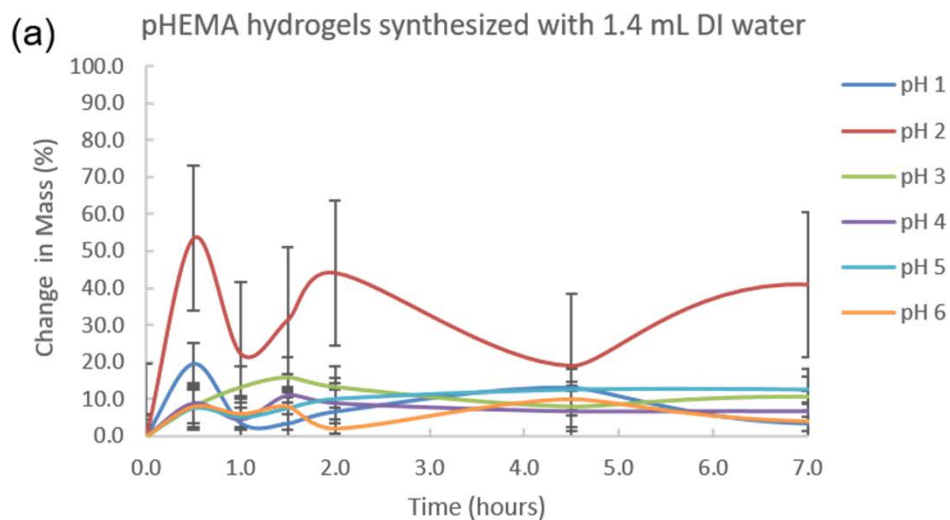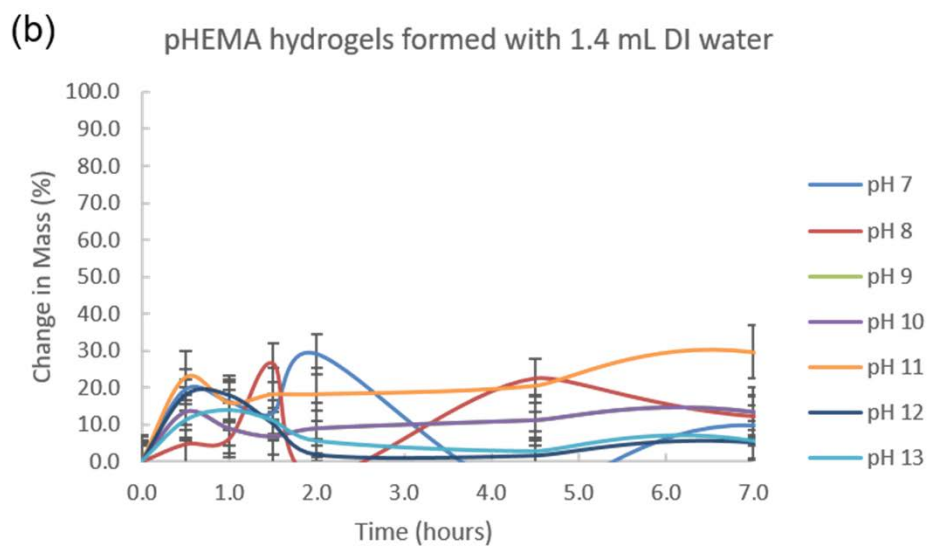

**Figure S3:** pH-dependent swelling studies of pHEMA hydrogels synthesized with 1.4 mL DI water.

Tables S1–S4 highlight the results from the novel experimental flow studies of different iron oxide nanoparticles (NPs) through hydrogel channels.

**Table S1:** Results from experimental flow of 0.09 mmol PVP/0.0017 mmol PEI-coated iron oxide nanoparticles (hydrodynamic diameter ~ 130 nm, PDI: 0.22, zeta potential: 11 mV) through hydrogel channels.

| No | Nanoparticle concentration (mg/mL Fe) | Mass of nanoparticles (g) | Trial No. | Pressure at inlet (atm) | Inlet volume (mL) | Pressure at outlet (atm) | Mass loss due to adhesion (g) | Average mass loss (g) | % mass loss (Avg) | Time elapsed (s) | Velocity (m/s) | Average velocity (m/s) |
|----|---------------------------------------|---------------------------|-----------|-------------------------|-------------------|--------------------------|-------------------------------|-----------------------|-------------------|------------------|----------------|------------------------|
| 1  | 0.011                                 | 2.008                     | 1         | 1.6                     | 1                 | 1                        | 0.058                         | 0.028                 | 1.411             | 7.36             | 0.0061         | 0.0058                 |
| 2  | 0.011                                 | 2.008                     | 2         | 1.6                     | 1                 | 1                        | 0.003                         | 0.028                 | 1.411             | 9.65             | 0.0047         | 0.0058                 |
| 3  | 0.011                                 | 2.008                     | 3         | 1.6                     | 1                 | 1                        | 0.024                         | 0.028                 | 1.411             | 6.82             | 0.0066         | 0.0058                 |
| 4  | 0.056                                 | 2.042                     | 1         | 1.6                     | 1                 | 1                        | 0.054                         | 0.030                 | 1.453             | 9.32             | 0.0048         | 0.0054                 |
| 5  | 0.056                                 | 2.042                     | 2         | 1.6                     | 1                 | 1                        | 0.026                         | 0.03                  | 1.453             | 8.01             | 0.0056         | 0.0054                 |
| 6  | 0.056                                 | 2.042                     | 3         | 1.6                     | 1                 | 1                        | 0.009                         | 0.03                  | 1.453             | 7.93             | 0.0057         | 0.0054                 |
| 7  | 0.284                                 | 2.212                     | 1         | 1.6                     | 1                 | 1                        | 0.064                         | 0.048                 | 2.155             | 9.12             | 0.0049         | 0.0055                 |
| 8  | 0.284                                 | 2.212                     | 2         | 1.6                     | 1                 | 1                        | 0.051                         | 0.048                 | 2.155             | 7.26             | 0.0062         | 0.0055                 |
| 9  | 0.284                                 | 2.212                     | 3         | 1.6                     | 1                 | 1                        | 0.028                         | 0.048                 | 2.155             | 8.56             | 0.0053         | 0.0055                 |
| 10 | 0.583                                 | 2.424                     | 1         | 1.6                     | 1                 | 1                        | 0.084                         | 0.061                 | 2.503             | 10.1             | 0.0045         | 0.0049                 |
| 11 | 0.583                                 | 2.424                     | 2         | 1.6                     | 1                 | 1                        | 0.031                         | 0.061                 | 2.503             | 9.25             | 0.0049         | 0.0049                 |
| 12 | 0.583                                 | 2.424                     | 3         | 1.6                     | 1                 | 1                        | 0.067                         | 0.061                 | 2.503             | 8.43             | 0.0053         | 0.0049                 |
| 13 | 1.581                                 | 3.060                     | 1         | 1.6                     | 1                 | 1                        | 0.081                         | 0.042                 | 1.362             | 9.8              | 0.0046         | 0.0052                 |
| 14 | 1.581                                 | 3.060                     | 2         | 1.6                     | 1                 | 1                        | 0.017                         | 0.042                 | 1.362             | 9.23             | 0.0049         | 0.0052                 |
| 15 | 1.581                                 | 3.060                     | 3         | 1.6                     | 1                 | 1                        | 0.027                         | 0.042                 | 1.362             | 7.39             | 0.0061         | 0.0052                 |
| 16 | 3.690                                 | 4.120                     | 1         | 1.6                     | 1                 | 1                        | 0.075                         | 0.045                 | 1.1               | 8.83             | 0.0051         | 0.0051                 |
| 17 | 3.690                                 | 4.120                     | 2         | 1.6                     | 1                 | 1                        | 0.028                         | 0.045                 | 1.1               | 9.42             | 0.0048         | 0.0051                 |
| 18 | 3.690                                 | 4.120                     | 3         | 1.6                     | 1                 | 1                        | 0.033                         | 0.045                 | 1.1               | 8.35             | 0.0054         | 0.0051                 |
| 19 | 11.070                                | 5.240                     | 1         | 1.6                     | 1                 | 1                        | 0.101                         | 0.065                 | 1.24              | 8.4              | 0.0054         | 0.0047                 |
| 20 | 11.070                                | 5.240                     | 2         | 1.6                     | 1                 | 1                        | 0.063                         | 0.065                 | 1.24              | 10.12            | 0.0044         | 0.0047                 |
| 21 | 11.070                                | 5.240                     | 3         | 1.6                     | 1                 | 1                        | 0.031                         | 0.065                 | 1.24              | 10.25            | 0.0044         | 0.0047                 |

**Table S2:** Results from experimental flow of 0.07 mmol PVP/ 0.005 mmol PEI-coated iron oxide nanoparticles (hydrodynamic size ~ 144 nm, PDI: 0.17, zeta potential: 15 mV) through hydrogel channels.

| No | Nanoparticle concentration (mg/mL Fe) | Mass of nanoparticles (g) | Trial No. | Pressure at inlet (atm) | Inlet volume (mL) | Pressure at outlet (atm) | Mass loss due to adhesion (g) | Average mass loss (g) | % mass loss (Avg) | Time elapsed (s) | Velocity (m/s) | Average velocity (m/s) |
|----|---------------------------------------|---------------------------|-----------|-------------------------|-------------------|--------------------------|-------------------------------|-----------------------|-------------------|------------------|----------------|------------------------|
| 1  | 0.011                                 | 2.008                     | 1         | 1.6                     | 1                 | 1                        | 0.103                         | 0.120                 | 5.958             | 9.49             | 0.0057         | 0.0054                 |
| 2  | 0.011                                 | 2.008                     | 2         | 1.6                     | 1                 | 1                        | 0.113                         | 0.12                  | 5.958             | 10.96            | 0.0049         | 0.0054                 |
| 3  | 0.011                                 | 2.008                     | 3         | 1.6                     | 1                 | 1                        | 0.143                         | 0.12                  | 5.958             | 9.49             | 0.0057         | 0.0054                 |
| 4  | 0.056                                 | 2.042                     | 1         | 1.6                     | 1                 | 1                        | 0.06                          | 0.054                 | 2.660             | 10.91            | 0.0049         | 0.0057                 |
| 5  | 0.056                                 | 2.042                     | 2         | 1.6                     | 1                 | 1                        | 0.041                         | 0.054                 | 2.66              | 9.15             | 0.0059         | 0.0057                 |
| 6  | 0.056                                 | 2.042                     | 3         | 1.6                     | 1                 | 1                        | 0.062                         | 0.054                 | 2.66              | 8.76             | 0.0062         | 0.0057                 |
| 7  | 0.284                                 | 2.212                     | 1         | 1.6                     | 1                 | 1                        | 0.139                         | 0.080                 | 3.617             | 12.28            | 0.0044         | 0.0053                 |
| 8  | 0.284                                 | 2.212                     | 2         | 1.6                     | 1                 | 1                        | 0.061                         | 0.08                  | 3.617             | 9.94             | 0.0054         | 0.0053                 |
| 9  | 0.284                                 | 2.212                     | 3         | 1.6                     | 1                 | 1                        | 0.04                          | 0.08                  | 3.617             | 8.7              | 0.0062         | 0.0053                 |
| 10 | 0.583                                 | 2.424                     | 1         | 1.6                     | 1                 | 1                        | 0.043                         | 0.037                 | 1.513             | 7.59             | 0.0071         | 0.0061                 |
| 11 | 0.583                                 | 2.424                     | 2         | 1.6                     | 1                 | 1                        | 0.025                         | 0.037                 | 1.513             | 10.8             | 0.0050         | 0.0061                 |
| 12 | 0.583                                 | 2.424                     | 3         | 1.6                     | 1                 | 1                        | 0.042                         | 0.037                 | 1.513             | 8.63             | 0.0063         | 0.0061                 |
| 13 | 1.581                                 | 3.060                     | 1         | 1.6                     | 1                 | 1                        | 0.064                         | 0.048                 | 1.558             | 11.19            | 0.0048         | 0.0055                 |
| 14 | 1.581                                 | 3.060                     | 2         | 1.6                     | 1                 | 1                        | 0.039                         | 0.048                 | 1.558             | 7.97             | 0.0068         | 0.0055                 |
| 15 | 1.581                                 | 3.060                     | 3         | 1.6                     | 1                 | 1                        | 0.04                          | 0.048                 | 1.558             | 11.11            | 0.0049         | 0.0055                 |
| 16 | 3.690                                 | 4.120                     | 1         | 1.6                     | 1                 | 1                        | 0.06                          | 0.053                 | 1.286             | 10.71            | 0.0050         | 0.0051                 |
| 17 | 3.690                                 | 4.120                     | 2         | 1.6                     | 1                 | 1                        | 0.029                         | 0.053                 | 1.286             | 10.52            | 0.0051         | 0.0051                 |
| 18 | 3.690                                 | 4.120                     | 3         | 1.6                     | 1                 | 1                        | 0.07                          | 0.053                 | 1.286             | 10.31            | 0.0052         | 0.0051                 |
| 19 | 11.070                                | 5.240                     | 1         | 1.6                     | 1                 | 1                        | 0.024                         | 0.028                 | 0.534             | 11.79            | 0.0046         | 0.0051                 |
| 20 | 11.070                                | 5.240                     | 2         | 1.6                     | 1                 | 1                        | 0.032                         | 0.028                 | 0.534             | 10.52            | 0.0051         | 0.0051                 |
| 21 | 11.070                                | 5.240                     | 3         | 1.6                     | 1                 | 1                        | 0.028                         | 0.028                 | 0.534             | 9.68             | 0.0056         | 0.0051                 |

**Table S3:** Results from experimental flow of 0.06 mmol PVP/0.007 mmol PEI-coated iron oxide nanoparticles (hydrodynamic size ~ 69 nm, PDI: 0.24, zeta potential: 18 mV) through hydrogel channels.

| No | Nanoparticle concentration (mg/mL Fe) | Mass of nanoparticles (g) | Trial No. | Pressure at inlet (atm) | Inlet volume (mL) | Pressure at outlet (atm) | Mass loss due to adhesion (g) | Average mass loss (g) | % mass loss (Avg) | Time elapsed (s) | Velocity (m/s) | Average velocity (m/s) |
|----|---------------------------------------|---------------------------|-----------|-------------------------|-------------------|--------------------------|-------------------------------|-----------------------|-------------------|------------------|----------------|------------------------|
| 1  | 0.011                                 | 2.008                     | 1         | 1.6                     | 1                 | 1                        | 0.081                         | 0.047                 | 2.340             | 10.25            | 0.0055         | 0.0059                 |
| 2  | 0.011                                 | 2.008                     | 2         | 1.6                     | 1                 | 1                        | 0.052                         | 0.047                 | 2.34              | 9.09             | 0.0062         | 0.0059                 |
| 3  | 0.011                                 | 2.008                     | 3         | 1.6                     | 1                 | 1                        | 0.008                         | 0.047                 | 2.34              | 9.29             | 0.0060         | 0.0059                 |
| 4  | 0.056                                 | 2.042                     | 1         | 1.6                     | 1                 | 1                        | 0.059                         | 0.044                 | 2.154             | 10.26            | 0.0055         | 0.0060                 |
| 5  | 0.056                                 | 2.042                     | 2         | 1.6                     | 1                 | 1                        | 0.034                         | 0.044                 | 2.154             | 8.33             | 0.0067         | 0.006                  |
| 6  | 0.056                                 | 2.042                     | 3         | 1.6                     | 1                 | 1                        | 0.039                         | 0.044                 | 2.154             | 9.57             | 0.0059         | 0.006                  |
| 7  | 0.284                                 | 2.212                     | 1         | 1.6                     | 1                 | 1                        | 0.013                         | 0.024                 | 1.085             | 9.89             | 0.0057         | 0.0064                 |
| 8  | 0.284                                 | 2.212                     | 2         | 1.6                     | 1                 | 1                        | 0.025                         | 0.024                 | 1.085             | 8.77             | 0.0064         | 0.0064                 |
| 9  | 0.284                                 | 2.212                     | 3         | 1.6                     | 1                 | 1                        | 0.034                         | 0.024                 | 1.085             | 7.86             | 0.0071         | 0.0064                 |
| 10 | 0.583                                 | 2.424                     | 1         | 1.6                     | 1                 | 1                        | 0.062                         | 0.059                 | 2.448             | 9.75             | 0.0057         | 0.0055                 |
| 11 | 0.583                                 | 2.424                     | 2         | 1.6                     | 1                 | 1                        | 0.041                         | 0.059                 | 2.448             | 11.31            | 0.0050         | 0.0055                 |
| 12 | 0.583                                 | 2.424                     | 3         | 1.6                     | 1                 | 1                        | 0.075                         | 0.059                 | 2.448             | 9.75             | 0.0057         | 0.0055                 |
| 13 | 1.581                                 | 3.060                     | 1         | 1.6                     | 1                 | 1                        | 0.116                         | 0.067                 | 2.179             | 9.23             | 0.0061         | 0.0059                 |
| 14 | 1.581                                 | 3.060                     | 2         | 1.6                     | 1                 | 1                        | 0.037                         | 0.067                 | 2.179             | 9.49             | 0.0059         | 0.0059                 |
| 15 | 1.581                                 | 3.060                     | 3         | 1.6                     | 1                 | 1                        | 0.047                         | 0.067                 | 2.179             | 9.63             | 0.0058         | 0.0059                 |
| 16 | 3.690                                 | 4.120                     | 1         | 1.6                     | 1                 | 1                        | 0.066                         | 0.046                 | 1.117             | 9.5              | 0.0059         | 0.0060                 |
| 17 | 3.690                                 | 4.120                     | 2         | 1.6                     | 1                 | 1                        | 0.026                         | 0.046                 | 1.117             | 9.3              | 0.0060         | 0.006                  |
| 18 | 3.690                                 | 4.120                     | 3         | 1.6                     | 1                 | 1                        | 0.046                         | 0.046                 | 1.117             | 9.29             | 0.0060         | 0.006                  |
| 19 | 11.070                                | 5.240                     | 1         | 1.6                     | 1                 | 1                        | 0.047                         | 0.057                 | 1.094             | 9.82             | 0.0057         | 0.0063                 |
| 20 | 11.070                                | 5.240                     | 2         | 1.6                     | 1                 | 1                        | 0.038                         | 0.057                 | 1.094             | 9.41             | 0.0060         | 0.0063                 |
| 21 | 11.070                                | 5.240                     | 3         | 1.6                     | 1                 | 1                        | 0.087                         | 0.057                 | 1.094             | 7.86             | 0.0071         | 0.0063                 |

**Table S4:** Results from experimental flow of 0.05 mmol PVP/0.008 mmol PEI iron oxide nanoparticles (hydrodynamic size ~ 140 nm, PDI: 0.12, zeta potential: 10 mV) through hydrogel channels.

| No | Nanoparticle concentration (mg/mL Fe) | Mass of nanoparticles (g) | Trial No. | Pressure at inlet (atm) | Inlet volume (mL) | Pressure at outlet (atm) | Mass loss due to adhesion (g) | Average mass loss (g) | % mass loss (Avg) | Time elapsed (s) | Velocity (m/s) | Average velocity (m/s) |
|----|---------------------------------------|---------------------------|-----------|-------------------------|-------------------|--------------------------|-------------------------------|-----------------------|-------------------|------------------|----------------|------------------------|
| 1  | 0.011                                 | 2.008                     | 1         | 1.6                     | 1                 | 1                        | 0.164                         | 0.078                 | 3.867             | 8.47             | 0.0055         | 0.0054                 |
| 2  | 0.011                                 | 2.008                     | 2         | 1.6                     | 1                 | 1                        | 0.027                         | 0.078                 | 3.867             | 8.99             | 0.0052         | 0.0054                 |
| 3  | 0.011                                 | 2.008                     | 3         | 1.6                     | 1                 | 1                        | 0.042                         | 0.078                 | 3.867             | 8.81             | 0.0053         | 0.0054                 |
| 4  | 0.056                                 | 2.042                     | 1         | 1.6                     | 1                 | 1                        | 0.094                         | 0.062                 | 3.019             | 8.95             | 0.0053         | 0.0051                 |
| 5  | 0.056                                 | 2.042                     | 2         | 1.6                     | 1                 | 1                        | 0.028                         | 0.062                 | 3.019             | 9.68             | 0.0049         | 0.0051                 |
| 6  | 0.056                                 | 2.042                     | 3         | 1.6                     | 1                 | 1                        | 0.063                         | 0.062                 | 3.019             | 8.87             | 0.0053         | 0.0051                 |
| 7  | 0.284                                 | 2.212                     | 1         | 1.6                     | 1                 | 1                        | 0.077                         | 0.057                 | 2.562             | 9.21             | 0.0051         | 0.0048                 |
| 8  | 0.284                                 | 2.212                     | 2         | 1.6                     | 1                 | 1                        | 0.039                         | 0.057                 | 2.562             | 10.78            | 0.0044         | 0.0048                 |
| 9  | 0.284                                 | 2.212                     | 3         | 1.6                     | 1                 | 1                        | 0.054                         | 0.057                 | 2.562             | 9.35             | 0.0050         | 0.0048                 |
| 10 | 0.583                                 | 2.424                     | 1         | 1.6                     | 1                 | 1                        | 0.031                         | 0.027                 | 1.100             | 9.39             | 0.0050         | 0.0050                 |
| 11 | 0.583                                 | 2.424                     | 2         | 1.6                     | 1                 | 1                        | 0.021                         | 0.027                 | 1.1               | 9.19             | 0.0051         | 0.005                  |
| 12 | 0.583                                 | 2.424                     | 3         | 1.6                     | 1                 | 1                        | 0.028                         | 0.027                 | 1.1               | 9.65             | 0.0049         | 0.005                  |
| 13 | 1.581                                 | 3.060                     | 1         | 1.6                     | 1                 | 1                        | 0.053                         | 0.045                 | 1.460             | 7.02             | 0.0067         | 0.0060                 |
| 14 | 1.581                                 | 3.060                     | 2         | 1.6                     | 1                 | 1                        | 0.039                         | 0.045                 | 1.46              | 8.79             | 0.0053         | 0.006                  |
| 15 | 1.581                                 | 3.060                     | 3         | 1.6                     | 1                 | 1                        | 0.042                         | 0.045                 | 1.46              | 7.95             | 0.0059         | 0.006                  |
| 16 | 3.690                                 | 4.120                     | 1         | 1.6                     | 1                 | 1                        | 0.051                         | 0.047                 | 1.133             | 9.61             | 0.0049         | 0.0050                 |
| 17 | 3.690                                 | 4.120                     | 2         | 1.6                     | 1                 | 1                        | 0.059                         | 0.047                 | 1.133             | 8.46             | 0.0056         | 0.005                  |
| 18 | 3.690                                 | 4.120                     | 3         | 1.6                     | 1                 | 1                        | 0.03                          | 0.047                 | 1.133             | 10.39            | 0.0045         | 0.005                  |
| 19 | 11.070                                | 5.240                     | 1         | 1.6                     | 1                 | 1                        | 0.03                          | 0.032                 | 0.604             | 9.34             | 0.0050         | 0.0053                 |
| 20 | 11.070                                | 5.240                     | 2         | 1.6                     | 1                 | 1                        | 0.045                         | 0.032                 | 0.604             | 7.49             | 0.0063         | 0.0053                 |
| 21 | 11.070                                | 5.240                     | 3         | 1.6                     | 1                 | 1                        | 0.02                          | 0.032                 | 0.604             | 10.25            | 0.0046         | 0.0053                 |



Tables S5 and S6 give a brief summary of the parameters used in our computational fluid dynamics (CFD) calculations for assessing flow and mass loss of iron oxide NPs.

**Table S5:** Table summarizing some key values used for CFD analysis of the lowest concentration of nanoparticles (2.008 g·mL<sup>-1</sup> Fe)

| Item                                             | Specification                                          |
|--------------------------------------------------|--------------------------------------------------------|
| Type of NPs                                      | 0.07 mmol PVP and 0.005 mmol PEI-coated iron oxide NPs |
| Hydrodynamic diameter of NPs                     | 144 nm                                                 |
| Inlet velocity                                   | 0 m/s                                                  |
| Average outlet velocity                          | 0.0054 m/s                                             |
| Length of tube                                   | 0.054 m                                                |
| Diameter of hydrogel tube, r<br>Straight tube    | 0.0040 m                                               |
| Reynolds number based on<br>diameter of the tube | 127.17                                                 |
| Density of solution                              | 5.24 g/cc                                              |
| Mass of solution at inlet                        | 2.008 g                                                |
| % Mass loss, experimental value                  | 5.96%                                                  |

Method used to find Reynolds number, Re

$$Re = \frac{Dv\rho}{\mu}$$

where, diameter of tube ( $D$ ) = 0.0040 m; velocity of the iron oxide NP at the outlet,  $v$  = 0.0054 m/s, density of the NPs,  $\rho$  = 5.24 g/cm<sup>3</sup> = 5.24 x 10<sup>3</sup> kg/m<sup>3</sup>, and viscosity ( $\mu$ ) = 8.90 x 10<sup>-4</sup> Pa·s

**Re = 127.17**

**Table S6:** Table summarizing some key values used for CFD analysis of the flow of iron oxide nanoparticles of concentration 4.12 g·mL<sup>-1</sup> Fe.

| Item                                           | Specification                                          |
|------------------------------------------------|--------------------------------------------------------|
| Type of NPs                                    | 0.07 mmol PVP and 0.005 mmol PEI-coated iron oxide NPs |
| Hydrodynamic diameter of NPs                   | 144 nm                                                 |
| Inlet velocity*                                | 0 m/s                                                  |
| Average outlet velocity                        | 0.0051 m/s                                             |
| Length of tube                                 | 0.054 m                                                |
| Diameter of hydrogel tube, r<br>Straight tube  | 0.0040 m                                               |
| Reynolds number based on diameter of the tube* | 120.1                                                  |
| Density of solution                            | 5.24 g/cc                                              |
| Mass of solution at inlet                      | 4.12 g                                                 |
| % Mass loss, experimental value                | 1.286%                                                 |

Method used to find Reynolds number, Re

$$Re = \frac{Dv\rho}{\mu}$$

where, diameter of tube ( $D$ ) = 0.0040 m; velocity of the iron oxide NP at the outlet,  $v$  = 0.0051 m/s, density of the NPs,  $\rho$  = 5.24 g/cc =  $5.24 \times 10^3$  kg/m<sup>3</sup>, and viscosity ( $\mu$ ) =  $8.90 \times 10^{-4}$  Pa·s

**Re = 120.1**

Figure S4 shows the size of the 69 nm sized iron oxide NPs coated with 0.06 mmol PVP/0.007 mmol PEI after being left undisturbed for six months.

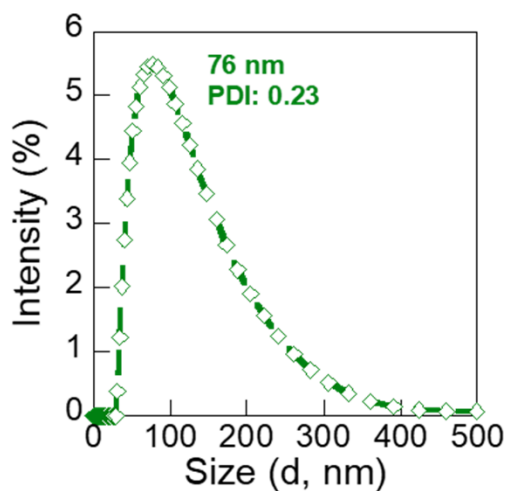

**Figure S4:** DLS size plot of 0.06 mmol PVP/0.007 mmol PEI-coated iron oxide NP sample solution (originally 69 nm in size) left undisturbed for six months.
